# Supplementary material for: Rapid automated production of tubular 3D intestine-on-a-chip with diverse cell types using coaxial bioprinting
Source: Royal Society of Chemistry journal article supplement (doi:10.1039/d4lc00731j), 2024-12-03
Supplement: d4lc00731j1.pdf [file d4lc00731j1.pdf]

Supplementary Materials

**Rapid Automated Production of Tubular 3D Intestine-on-a-Chip with  
Diverse Cell Types Using Coaxial Bioprinting**

Heeju Song<sup>1</sup>, Yeonjin Hong<sup>1</sup> and Hyungseok Lee<sup>1,2,\*</sup>

<sup>1</sup> Department of Smart Health Science and Technology, Kangwon National University,  
Chuncheon, Republic of Korea

<sup>2</sup> Department of Mechanical and Biomedical, Mechatronics Engineering, Kangwon National  
University, Chuncheon, Republic of Korea

\* Corresponding author

Hyungseok Lee, Ph.D.

Department of Mechanical and Biomedical, Mechatronics Engineering, Kangwon National  
University (KNU), 1, Kangwondaehak-gil, Chuncheon-si, Gangwon-do, Republic of Korea

Tel.: +82 33 250 6309; E-mail address: ahl@kangwon.ac.kr

## Verification of the Triple-Layer Small Intestine Model Structure

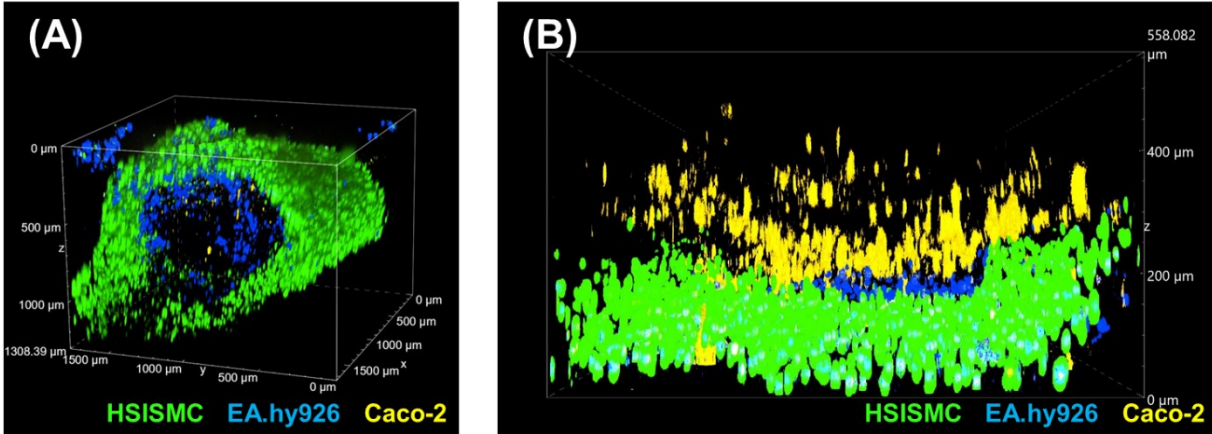

**Supplementary Figure 1** The triple-layer structure of the bio-printed model was confirmed using a cell tracker. As shown, the well-formed triple-layer structure is visible in (A), and the Caco-2 cells in the innermost layer, which are less visible due to their internal location, were partially magnified in (B) to observe the cell arrangement along the z-axis.
